# Supplementary material for: Dual-gRNA Approach With Limited Off-Target Effect Corrects C9ORF72 Repeat Expansion In Vivo
Source: Research Square preprint supplement (doi:10.21203/rs.3.rs-870138/v1), 2021-09-23
Supplement: Supplementary file 1 [file b24470f959645351378a4b28.docx]

**Dual-gRNA approach with limited off-target effect corrects *C9ORF72* repeat expansion *in vivo***

Xuejiao Piao1, 2, 3, 4, 5, Dawei Meng1, 2, 3, 4, 5, Xue Zhang1, 3, 4, 5, Qiang Song1, 4, Hailong Lv1, 2, 3, 4, and Yichang Jia1, 3, 4, #

1 School of Medicine, Medical Science Building, Room D204, Tsinghua University, Beijing, China, 100084.

2 School of Life Sciences, Tsinghua University

3 Peking-Tsinghua Joint Center for Life Sciences.

4 IDG/McGovern Institute for Brain Research at Tsinghua.

5 These authors contributed equally to this work.

# Corresponding author

Please address correspondence to:

Yichang Jia, Ph.D.

School of Medicine, Medical Science Building, Room D204, Tsinghua University, Beijing, 100084, P. R. China

Tel: 86-10-62781045

Email: [yichangjia@tsinghua.edu.cn](mailto:yichangjia@tsinghua.edu.cn)

| Supplementary Table 1. Off-target analysis of gRNAs for removal of *C9ORF72* repeat expansion. | | | | | | |
| --- | --- | --- | --- | --- | --- | --- |
| gRNA | Up-/down- stream of Ex1b | Exon (coding) | Exon +intron | Non-coding RNA | intergenic region | Total number of off-target sites |
| a | Downstream | 38 | 225 | 45 | 143 | 451 |
| b | Downstream | 14 | 52 | 13 | 33 | 112 |
| c | Downstream | 17 | 98 | 23 | 56 | 194 |
| d | Downstream | 107 | 700 | 103 | 370 | 1280 |
| e | Downstream | 29 | 192 | 46 | 94 | 361 |
| f | Downstream | 20 | 158 | 34 | 71 | 283 |
| g | Downstream | 58 | 370 | 63 | 166 | 657 |
| 1 | Upstream | 4 | 19 | 11 | 37 | 71 |
| 2 | Downstream | 1 | 12 | 0 | 6 | 19 |
| 3 | Upstream | 1 | 38 | 11 | 26 | 76 |
| Note: The online off-target predication programs employed for the purpose. The off-target sites were predicted by sgRNA Designer (http://portals.broadinstitute.org/gpp/public/analysis-tools/sgrna-design). The CFD (Cutting Frequency Determination) score we used between 0.2 to 1.0 (0.2≤CFD<1.0). | | | | | | |

| Supplementary Table 2. Numbers of gRNA1, gRNA2, gRNA3 and gRNAb off target sites predicted by Cas-OFFinder. | | | | | | | | |
| --- | --- | --- | --- | --- | --- | --- | --- | --- |
|  | Numbers of off-target sites | | | | | | | |
| gRNA | 0- | 1- | 2- | 3- | 4- | 5- | 6- | 7-mismatches |
| gRNA1 | 1 | 0 | 0 | 9 | 84 | 886 | 6500 | 41248 |
| gRNA2 | 1 | 0 | 0 | 1 | 21 | 326 | 3296 | 24889 |
| gRNA3 | 1 | 0 | 1 | 9 | 135 | 2146 | 7870 | 43595 |
| gRNAb | 1 | 0 | 1 | 43 | 303 | 2004 | 12532 | 59337 |
| Note: The off-target numbers were predicted by Cas-OFFinder (http://www.rgenome.net/cas-offinder/). | | | | | | | | |
